# Supplementary material
Source: PubMed Central journal article supplement (PMC7744999)
Supplement: ciaa233_suppl_supplementary_tables.pdf [file ciaa233_suppl_supplementary_tables.pdf]

Supplementary Figure 2 data table.

| EGP | ANCOVA                                             |                                                    |         | Multivariate analysis                          |              |         |
|-----|----------------------------------------------------|----------------------------------------------------|---------|------------------------------------------------|--------------|---------|
|     | <i>Strongyloides</i><br>Positive<br>R <sup>2</sup> | <i>Strongyloides</i><br>Negative<br>R <sup>2</sup> | P Value | Increase EGP to<br><i>Strongyloides</i><br>IgG | CI           | P Value |
| ECP | 0.55                                               | 0.003                                              | <0.001  | 251.9                                          | 85.3-418.7   | 0.003   |
| EPO | 0.41                                               | 0.00048                                            | 0.04    | 1.2                                            | -0.02-2.35   | 0.053   |
| MBP | 0.017                                              | 0.011                                              | 0.29    | -48.1                                          | -7.3-(-25.8) | <0.001  |
| EDN | 0.18                                               | 0.0021                                             | 0.19    | -5.8                                           | -11.7-0.11   | 0.054   |

Supplementary Figure 3 data table.

| EGP        | Univariate analysis |                           |                  | Multivariate analysis |                  |             |
|------------|---------------------|---------------------------|------------------|-----------------------|------------------|-------------|
|            | Spearman r          | 95% CI                    | P Value          | Slope<br>(Estimate)   | CI               | P Value     |
| ECP        | 0.07888             | -0.08946-<br>0.2428       | 0.34             | 0.018                 | -0.07-0.11       | 0.69        |
| EPO        | 0.01737             | -0.1514-<br>0.1852        | 0.84             | 1.65                  | -11.7-15.0       | 0.81        |
| <b>MBP</b> | <b>0.03090</b>      | <b>0.1496-<br/>0.4528</b> | <b>&lt;0.001</b> | <b>0.70</b>           | <b>0.08-1.31</b> | <b>0.03</b> |
| <b>EDN</b> | <b>0.3778</b>       | <b>0.2248-<br/>0.5126</b> | <b>&lt;0.001</b> | <b>2.83</b>           | <b>0.24-5.4</b>  | <b>0.03</b> |
